# Supplementary material for: Biochemical characterization of extremozyme L-asparaginase from Pseudomonas sp. PCH199 for therapeutics
Source: PubMed Central journal article supplement (PMC9958223; doi:10.1186/s13568-023-01521-2), 2023-02-24
Supplement: 13568_2023_1521_MOESM1_ESM.pdf [file 13568_2023_1521_MOESM1_ESM.pdf]

**Title: Biochemical characterization of extremozyme L-asparaginase from *Pseudomonas* sp. PCH199 for therapeutics**

**Authors: Sanyukta Darnal<sup>1,2</sup>, Vijeta Patial<sup>1,2</sup>, Virender Kumar<sup>1</sup>, Subhash Kumar<sup>1,2</sup>, Vijay Kumar<sup>1</sup>, Yogendra S. Padwad<sup>2,3</sup>, Dharam Singh<sup>1,2\*</sup>**

**Authors Affiliations:**

<sup>1</sup>CSIR-Institute of Himalayan Bioresource Technology, Palampur, Himachal Pradesh-176 061, INDIA.

<sup>2</sup>Academy of Scientific and Innovative Research (AcSIR), Ghaziabad 201 002, INDIA.

<sup>3</sup>Dietetics & Nutrition Technology Division, CSIR-Institute of Himalayan Bioresource Technology, Palampur, Himachal Pradesh-176 061, INDIA

**\*Corresponding Author**

Molecular and Microbial Genetics Lab, Biotechnology Division,

CSIR-Institute of Himalayan Bioresource Technology,

Palampur, Himachal Pradesh, INDIA-176 061

Phone: +91-1894-233339, ext. 422

Fax: + 91-1894-230433

E-mail: dharamsingh@ihbt.res.in; dharams14@gmail.com

**Fig. S1** Qualitative estimation of L-ASNase production by PCH199. The strain *Pseudomonas* sp. PCH199 was streaked on M9 medium supplemented with indicator dye phenol red. After 24h of incubation at 28 °C, color change around the bacterial colony from yellow to pink has indicated L-asparagine hydrolysis by L-ASNase due to change in pH.

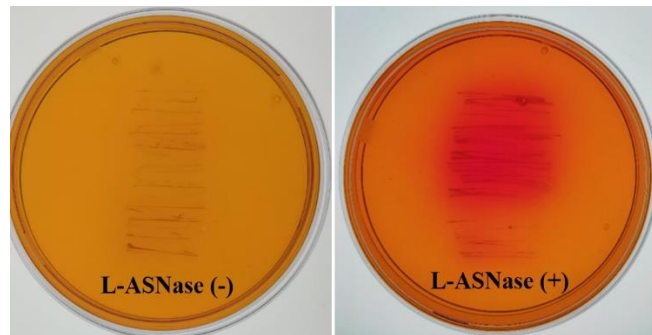

**Fig. S2** Phylogenetic tree of *Pseudomonas* sp. PCH199 with related strains based on 16S rRNA gene sequence analysis. The tree was constructed by maximum likelihood method using MEGA11 with 1000 boot-strapping replication. PCH199 showed 99.06 % sequence similarity to *Pseudomonas glycinae* MS586(T).

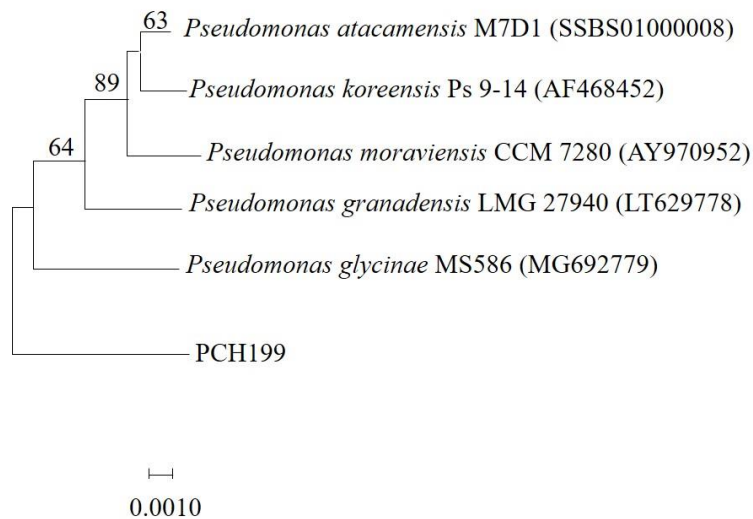

**Fig. S3** Graphical representation of kinetic study of PCH199 L-ASNase. Determination of  $K_m$  and  $V_{max}$  of purified L-ASNase for L-glutamine by non-linear regression analysis of experimental steady-state data. (a) Plot of the reaction velocities ( $V$ ) versus substrate concentration ( $S$ : 0.02 – 0.5 mM) fitted to the Michaelis-Menten equation. (b) The corresponding Lineweaver-Burk plot ( $K_m = 0.034$  mM and  $V_{max} = 57.98$  U/mg) of L-ASNase catalyzed reaction.

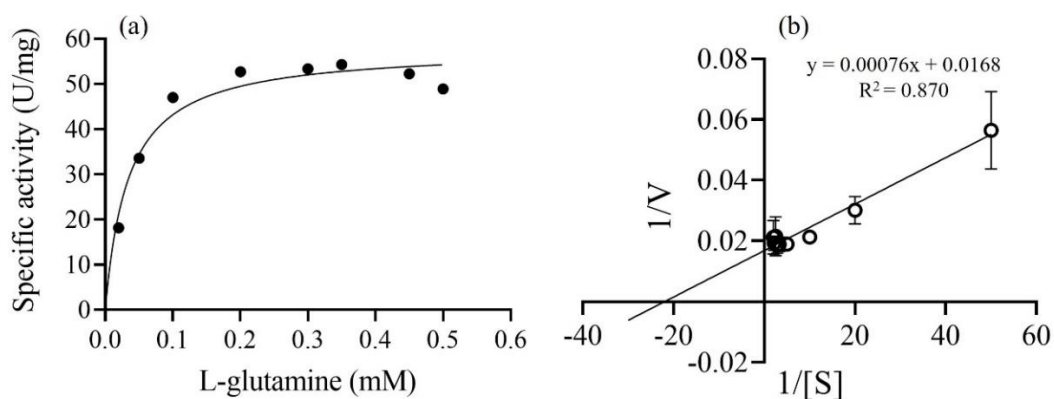

**Fig.S4** Graphical representation of periplasmic L-ASNase activity when PCH199 was cultured at M9 minimal medium with various pH (5.8-7.5) and periplasmic L-ASNase activity corresponding to each pH was represented.

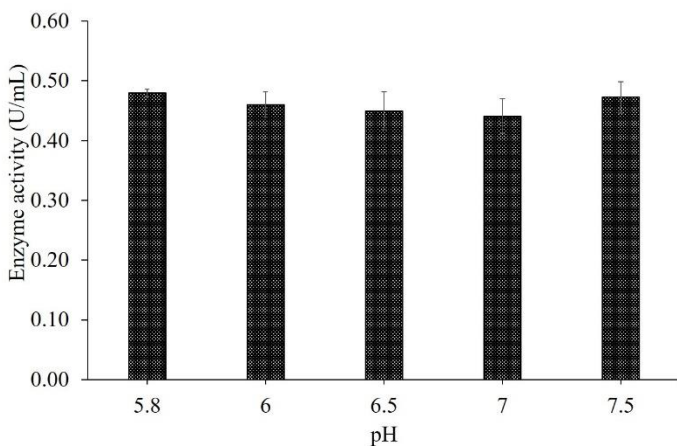

**Table S1** Central Composite Design of selected variables and the responses thereof. The maximum response obtained with a specific condition is marked in bold font.

| Run Order | Buffer concentration (mM) | L-asparagine concentration (%) | Glucose concentration (%) | Response (U/mL) |
|-----------|---------------------------|--------------------------------|---------------------------|-----------------|
| 1         | 50                        | 2.732                          | 0.25                      | 0.541           |
| 2         | 50                        | 2.732                          | 0.25                      | 0.664           |
| <b>3</b>  | <b>100</b>                | <b>2.0</b>                     | <b>0.5</b>                | <b>0.766</b>    |
| 4         | 0                         | 2.0                            | 0                         | 0.038           |
| 5         | 0                         | 2.0                            | 0.5                       | 0.009           |
| 6         | 100                       | 2.0                            | 0                         | 0.635           |
| 7         | 50                        | 1.0                            | 0.25                      | 0.456           |
| 8         | 50                        | 1.0                            | 0.25                      | 0.444           |
| 9         | 50                        | 1.0                            | -0.183                    | 0.328           |
| 10        | -36.602                   | 1.0                            | 0.25                      | 0.232           |
| 11        | 50                        | 1.0                            | 0.683                     | 0.437           |
| 12        | 136.603                   | 1.0                            | 0.25                      | 0.553           |
| 13        | 50                        | 1.0                            | 0.25                      | 0.456           |
| 14        | 50                        | 1.0                            | 0.25                      | 0.451           |
| 15        | 50                        | -0.732                         | 0.25                      | 0.048           |
| 16        | 50                        | -0.732                         | 0.25                      | 0.036           |
| 17        | 100                       | 0                              | 0.5                       | 0.026           |
| 18        | 0                         | 0                              | 0.5                       | -0.024          |
| 19        | 0                         | 0                              | 0                         | -0.019          |
| 20        | 100                       | 0                              | 0                         | 0.046           |

**Table S2** Analysis of variance of second-order polynomial model for the effect of different variables on L-ASNase production.

| Source                     | Term | df | Error df | F-value | p-value | Remark      |
|----------------------------|------|----|----------|---------|---------|-------------|
| Whole-plot                 |      | 2  | 3.46     | 9.51    | 0.0394  | Significant |
| b-Asparagine concentration |      | 1  | 3.38     | 16.97   | 0.0205  |             |
| b <sup>2</sup>             |      | 1  | 3.53     | 2.05    | 0.2347  |             |
| Subplot                    |      | 7  | 6.55     | 14.40   | 0.0016  | Significant |

---

|                                    |   |      |        |        |
|------------------------------------|---|------|--------|--------|
| A-Salt concentration               | 1 | 7.20 | 56.62  | 0.0001 |
| C-Glucose concentration            | 1 | 7.20 | 1.45   | 0.2662 |
| Ab                                 | 1 | 7.20 | 42.13  | 0.0003 |
| AC                                 | 1 | 7.20 | 0.9731 | 0.3559 |
| bC                                 | 1 | 7.20 | 0.1425 | 0.7167 |
| A <sup>2</sup>                     | 1 | 3.83 | 2.28   | 0.2089 |
| C <sup>2</sup>                     | 1 | 3.83 | 2.52   | 0.1906 |
| R <sup>2</sup> (predicted) = 0.954 |   |      |        |        |
| R <sup>2</sup> (adjusted) = 0.892  |   |      |        |        |

---

df, indicates for degree of freedom.
